# Supplementary material for: A Follow-Up to the Geographical Distribution of Anopheles Species in Malaria-Endemic and Non-Endemic Areas of Honduras
Source: MDPI journal article supplement (doi:10.3390/insects13060548), 2022-06-15
Supplement: s1 [file s1]

Table S1. Description of the anopheline species found by municipality and result of the DNA detection analysis of *Plasmodium* spp.

| No | COD                   | Department     | Municipality   | Locality      | Collection Method  | Family    | Genus            | Subgenus            | Species             | Plasmodium_cox1 |
|----|-----------------------|----------------|----------------|---------------|--------------------|-----------|------------------|---------------------|---------------------|-----------------|
| 1  | HND-2021-GAD-015-0001 | Gracias a Dios | Puerto Lempira | Lisagnia      | CDC Light Trap     | Culicidae | <i>Anopheles</i> | <i>Nyssorhyncus</i> | <i>argyritarsis</i> | NEG             |
| 2  | HND-2021-GAD-016-0003 | Gracias a Dios | Puerto Lempira | Yabaltara     | CDC Light Trap     | Culicidae | <i>Anopheles</i> | <i>Nyssorhyncus</i> | <i>albimanus</i>    | Not processed   |
| 3  | HND-2021-GAD-016-0004 | Gracias a Dios | Puerto Lempira | Yabaltara     | CDC Light Trap     | Culicidae | <i>Anopheles</i> | <i>Nyssorhyncus</i> | <i>albimanus</i>    | Not processed   |
| 4  | HND-2021-GAD-016-0005 | Gracias a Dios | Puerto Lempira | Yabaltara     | CDC Light Trap     | Culicidae | <i>Anopheles</i> | <i>Nyssorhyncus</i> | <i>albimanus</i>    | Not processed   |
| 5  | HND-2021-GAD-022-0011 | Gracias a Dios | Puerto Lempira | Auka centro   | Resting collection | Culicidae | <i>Anopheles</i> | <i>Nyssorhyncus</i> | <i>albimanus</i>    | NEG             |
| 6  | HND-2021-GAD-022-0014 | Gracias a Dios | Puerto Lempira | Auka centro   | Resting collection | Culicidae | <i>Anopheles</i> | <i>Nyssorhyncus</i> | <i>albimanus</i>    | Not processed   |
| 7  | HND-2021-GAD-022-0015 | Gracias a Dios | Puerto Lempira | Auka centro   | Resting collection | Culicidae | <i>Anopheles</i> | <i>Nyssorhyncus</i> | <i>albimanus</i>    | Not processed   |
| 8  | HND-2021-GAD-022-0032 | Gracias a Dios | Puerto Lempira | Auka centro   | Resting collection | Culicidae | <i>Anopheles</i> | <i>Nyssorhyncus</i> | <i>albimanus</i>    | Not processed   |
| 9  | HND-2021-GAD-022-0033 | Gracias a Dios | Puerto Lempira | Auka centro   | Resting collection | Culicidae | <i>Anopheles</i> | <i>Nyssorhyncus</i> | <i>albimanus</i>    | Not processed   |
| 10 | HND-2021-GAD-022-0034 | Gracias a Dios | Puerto Lempira | Auka centro   | Resting collection | Culicidae | <i>Anopheles</i> | <i>Nyssorhyncus</i> | <i>albimanus</i>    | Not processed   |
| 11 | HND-2021-GAD-022-0038 | Gracias a Dios | Puerto Lempira | Auka centro   | Resting collection | Culicidae | <i>Anopheles</i> | <i>Nyssorhyncus</i> | <i>albimanus</i>    | NEG             |
| 12 | HND-2021-GAD-022-0039 | Gracias a Dios | Puerto Lempira | Auka centro   | Resting collection | Culicidae | <i>Anopheles</i> | <i>Nyssorhyncus</i> | <i>albimanus</i>    | Not processed   |
| 13 | HND-2021-GAD-022-0040 | Gracias a Dios | Puerto Lempira | Auka centro   | Resting collection | Culicidae | <i>Anopheles</i> | <i>Nyssorhyncus</i> | <i>albimanus</i>    | Not processed   |
| 14 | HND-2021-GAD-022-0043 | Gracias a Dios | Puerto Lempira | Auka centro   | Resting collection | Culicidae | <i>Anopheles</i> | <i>Nyssorhyncus</i> | <i>albimanus</i>    | NEG             |
| 15 | HND-2021-GAD-022-0044 | Gracias a Dios | Puerto Lempira | Auka centro   | Resting collection | Culicidae | <i>Anopheles</i> | <i>Nyssorhyncus</i> | <i>albimanus</i>    | NEG             |
| 16 | HND-2021-GAD-014-0049 | Gracias a Dios | Puerto Lempira | Barrio Alabar | Resting collection | Culicidae | <i>Anopheles</i> | <i>Nyssorhyncus</i> | <i>albimanus</i>    | Not processed   |
| 17 | HND-2021-GAD-022-0050 | Gracias a Dios | Puerto Lempira | Auka centro   | Resting collection | Culicidae | <i>Anopheles</i> | <i>Nyssorhyncus</i> | <i>albimanus</i>    | Not processed   |
| 18 | HND-2021-GAD-022-0051 | Gracias a Dios | Puerto Lempira | Auka centro   | Resting collection | Culicidae | <i>Anopheles</i> | <i>Nyssorhyncus</i> | <i>albimanus</i>    | Not processed   |
| 19 | HND-2021-GAD-022-0052 | Gracias a Dios | Puerto Lempira | Auka centro   | Resting collection | Culicidae | <i>Anopheles</i> | <i>Nyssorhyncus</i> | <i>albimanus</i>    | Not processed   |
| 20 | HND-2021-GAD-022-0053 | Gracias a Dios | Puerto Lempira | Auka centro   | Resting collection | Culicidae | <i>Anopheles</i> | <i>Nyssorhyncus</i> | <i>albimanus</i>    | Not processed   |
| 21 | HND-2021-GAD-022-0054 | Gracias a Dios | Puerto Lempira | Auka centro   | Resting collection | Culicidae | <i>Anopheles</i> | <i>Nyssorhyncus</i> | <i>albimanus</i>    | Not processed   |
| 22 | HND-2021-GAD-022-0055 | Gracias a Dios | Puerto Lempira | Auka centro   | Resting collection | Culicidae | <i>Anopheles</i> | <i>Nyssorhyncus</i> | <i>albimanus</i>    | Not processed   |
| 23 | HND-2021-GAD-022-0056 | Gracias a Dios | Puerto Lempira | Auka centro   | Resting collection | Culicidae | <i>Anopheles</i> | <i>Nyssorhyncus</i> | <i>albimanus</i>    | Not processed   |

|    |                       |                |                |               |                    |           |                  |                     |                  |               |
|----|-----------------------|----------------|----------------|---------------|--------------------|-----------|------------------|---------------------|------------------|---------------|
| 24 | HND-2021-GAD-022-0059 | Gracias a Dios | Puerto Lempira | Auka centro   | Resting collection | Culicidae | <i>Anopheles</i> | <i>Nyssorhyncus</i> | <i>albimanus</i> | Not processed |
| 25 | HND-2021-GAD-022-0060 | Gracias a Dios | Puerto Lempira | Auka centro   | Resting collection | Culicidae | <i>Anopheles</i> | <i>Nyssorhyncus</i> | <i>albimanus</i> | Not processed |
| 26 | HND-2021-GAD-022-0061 | Gracias a Dios | Puerto Lempira | Auka centro   | Resting collection | Culicidae | <i>Anopheles</i> | <i>Nyssorhyncus</i> | <i>albimanus</i> | Not processed |
| 27 | HND-2021-GAD-022-0063 | Gracias a Dios | Puerto Lempira | Auka centro   | Resting collection | Culicidae | <i>Anopheles</i> | <i>Nyssorhyncus</i> | <i>albimanus</i> | Not processed |
| 28 | HND-2021-GAD-022-0064 | Gracias a Dios | Puerto Lempira | Auka centro   | Resting collection | Culicidae | <i>Anopheles</i> | <i>Nyssorhyncus</i> | <i>albimanus</i> | Not processed |
| 29 | HND-2021-GAD-022-0065 | Gracias a Dios | Puerto Lempira | Auka centro   | Resting collection | Culicidae | <i>Anopheles</i> | <i>Nyssorhyncus</i> | <i>albimanus</i> | Not processed |
| 30 | HND-2021-GAD-022-0066 | Gracias a Dios | Puerto Lempira | Auka centro   | Resting collection | Culicidae | <i>Anopheles</i> | <i>Nyssorhyncus</i> | <i>albimanus</i> | Not processed |
| 31 | HND-2021-GAD-022-0067 | Gracias a Dios | Puerto Lempira | Auka centro   | Resting collection | Culicidae | <i>Anopheles</i> | <i>Nyssorhyncus</i> | <i>albimanus</i> | Not processed |
| 32 | HND-2021-GAD-022-0068 | Gracias a Dios | Puerto Lempira | Auka centro   | Resting collection | Culicidae | <i>Anopheles</i> | <i>Nyssorhyncus</i> | <i>albimanus</i> | NEG           |
| 33 | HND-2021-GAD-001-0069 | Gracias a Dios | Puerto Lempira | Barrio Usupum | Shannon trap       | Culicidae | <i>Anopheles</i> | <i>Anopheles</i>    | <i>crucians</i>  | NEG           |
| 34 | HND-2021-GAD-022-0070 | Gracias a Dios | Puerto Lempira | Auka centro   | Resting collection | Culicidae | <i>Anopheles</i> | <i>Nyssorhyncus</i> | <i>albimanus</i> | NEG           |
| 35 | HND-2021-GAD-022-0071 | Gracias a Dios | Puerto Lempira | Auka centro   | Resting collection | Culicidae | <i>Anopheles</i> | <i>Nyssorhyncus</i> | <i>albimanus</i> | Not processed |
| 36 | HND-2021-GAD-022-0072 | Gracias a Dios | Puerto Lempira | Auka centro   | Resting collection | Culicidae | <i>Anopheles</i> | <i>Nyssorhyncus</i> | <i>albimanus</i> | Not processed |
| 37 | HND-2021-GAD-022-0073 | Gracias a Dios | Puerto Lempira | Auka centro   | Resting collection | Culicidae | <i>Anopheles</i> | <i>Nyssorhyncus</i> | <i>albimanus</i> | Not processed |
| 38 | HND-2021-GAD-022-0074 | Gracias a Dios | Puerto Lempira | Auka centro   | Resting collection | Culicidae | <i>Anopheles</i> | <i>Nyssorhyncus</i> | <i>albimanus</i> | NEG           |
| 39 | HND-2021-GAD-022-0075 | Gracias a Dios | Puerto Lempira | Auka centro   | Resting collection | Culicidae | <i>Anopheles</i> | <i>Nyssorhyncus</i> | <i>albimanus</i> | NEG           |
| 40 | HND-2021-GAD-005-0076 | Gracias a Dios | Puerto Lempira | Dapat         | CDC Light Trap     | Culicidae | <i>Anopheles</i> | <i>Nyssorhyncus</i> | <i>albimanus</i> | NEG           |
| 41 | HND-2021-GAD-022-0077 | Gracias a Dios | Puerto Lempira | Auka centro   | Resting collection | Culicidae | <i>Anopheles</i> | <i>Nyssorhyncus</i> | <i>albimanus</i> | Not processed |
| 42 | HND-2021-GAD-022-0078 | Gracias a Dios | Puerto Lempira | Auka centro   | Resting collection | Culicidae | <i>Anopheles</i> | <i>Nyssorhyncus</i> | <i>albimanus</i> | Not processed |
| 43 | HND-2021-GAD-022-0079 | Gracias a Dios | Puerto Lempira | Auka centro   | Resting collection | Culicidae | <i>Anopheles</i> | <i>Nyssorhyncus</i> | <i>albimanus</i> | NEG           |
| 44 | HND-2021-GAD-022-0080 | Gracias a Dios | Puerto Lempira | Auka centro   | Resting collection | Culicidae | <i>Anopheles</i> | <i>Nyssorhyncus</i> | <i>albimanus</i> | NEG           |
| 45 | HND-2021-GAD-022-0081 | Gracias a Dios | Puerto Lempira | Auka centro   | Resting collection | Culicidae | <i>Anopheles</i> | <i>Nyssorhyncus</i> | <i>albimanus</i> | Not processed |
| 46 | HND-2021-GAD-022-0082 | Gracias a Dios | Puerto Lempira | Auka centro   | Resting collection | Culicidae | <i>Anopheles</i> | <i>Nyssorhyncus</i> | <i>albimanus</i> | Not processed |
| 47 | HND-2021-GAD-022-0092 | Gracias a Dios | Puerto Lempira | Auka centro   | Resting collection | Culicidae | <i>Anopheles</i> | <i>Nyssorhyncus</i> | <i>albimanus</i> | Not processed |
| 48 | HND-2021-GAD-022-0093 | Gracias a Dios | Puerto Lempira | Auka centro   | Resting collection | Culicidae | <i>Anopheles</i> | <i>Nyssorhyncus</i> | <i>albimanus</i> | Not processed |
| 49 | HND-2021-GAD-022-0094 | Gracias a Dios | Puerto Lempira | Auka centro   | Resting collection | Culicidae | <i>Anopheles</i> | <i>Nyssorhyncus</i> | <i>albimanus</i> | NEG           |
| 50 | HND-2021-GAD-022-0098 | Gracias a Dios | Puerto Lempira | Auka centro   | Resting collection | Culicidae | <i>Anopheles</i> | <i>Nyssorhyncus</i> | <i>albimanus</i> | NEG           |

[illegible]

|     |                       |                |                |             |                    |           |                  |                     |                      |               |
|-----|-----------------------|----------------|----------------|-------------|--------------------|-----------|------------------|---------------------|----------------------|---------------|
| 78  | HND-2021-GAD-022-0134 | Gracias a Dios | Puerto Lempira | Auka centro | Resting collection | Culicidae | <i>Anopheles</i> | <i>Nyssorhyncus</i> | <i>albimanus</i>     | NEG           |
| 79  | HND-2021-GAD-022-0135 | Gracias a Dios | Puerto Lempira | Auka centro | Resting collection | Culicidae | <i>Anopheles</i> | <i>Nyssorhyncus</i> | <i>albimanus</i>     | NEG           |
| 80  | HND-2021-GAD-022-0136 | Gracias a Dios | Puerto Lempira | Auka centro | Resting collection | Culicidae | <i>Anopheles</i> | <i>Nyssorhyncus</i> | <i>albimanus</i>     | NEG           |
| 81  | HND-2021-GAD-022-0137 | Gracias a Dios | Puerto Lempira | Auka centro | Resting collection | Culicidae | <i>Anopheles</i> | <i>Nyssorhyncus</i> | <i>albimanus</i>     | NEG           |
| 82  | HND-2021-GAD-012-0138 | Gracias a Dios | Puerto Lempira | Cocodacra   | Resting collection | Culicidae | <i>Anopheles</i> | <i>Nyssorhyncus</i> | <i>albimanus</i>     | NEG           |
| 83  | HND-2021-GAD-022-0139 | Gracias a Dios | Puerto Lempira | Auka centro | Resting collection | Culicidae | <i>Anopheles</i> | <i>Anopheles</i>    | <i>vestitipennis</i> | Not processed |
| 84  | HND-2021-GAD-022-0140 | Gracias a Dios | Puerto Lempira | Auka centro | Resting collection | Culicidae | <i>Anopheles</i> | <i>Anopheles</i>    | <i>vestitipennis</i> | Not processed |
| 85  | HND-2021-GAD-022-0141 | Gracias a Dios | Puerto Lempira | Auka centro | Resting collection | Culicidae | <i>Anopheles</i> | <i>Anopheles</i>    | <i>vestitipennis</i> | Not processed |
| 86  | HND-2021-GAD-023-0142 | Gracias a Dios | Puerto Lempira | Suhi        | Resting collection | Culicidae | <i>Anopheles</i> | <i>Nyssorhyncus</i> | <i>albimanus</i>     | Not processed |
| 87  | HND-2021-GAD-023-0143 | Gracias a Dios | Puerto Lempira | Suhi        | Resting collection | Culicidae | <i>Anopheles</i> | <i>Nyssorhyncus</i> | <i>albimanus</i>     | Not processed |
| 88  | HND-2021-GAD-023-0144 | Gracias a Dios | Puerto Lempira | Suhi        | Resting collection | Culicidae | <i>Anopheles</i> | <i>Nyssorhyncus</i> | <i>albimanus</i>     | Not processed |
| 89  | HND-2021-GAD-023-0145 | Gracias a Dios | Puerto Lempira | Suhi        | Resting collection | Culicidae | <i>Anopheles</i> | <i>Nyssorhyncus</i> | <i>albimanus</i>     | Not processed |
| 90  | HND-2021-GAD-023-0146 | Gracias a Dios | Puerto Lempira | Suhi        | Resting collection | Culicidae | <i>Anopheles</i> | <i>Nyssorhyncus</i> | <i>albimanus</i>     | Not processed |
| 91  | HND-2021-GAD-023-0147 | Gracias a Dios | Puerto Lempira | Suhi        | Resting collection | Culicidae | <i>Anopheles</i> | <i>Nyssorhyncus</i> | <i>albimanus</i>     | Not processed |
| 92  | HND-2021-GAD-023-0148 | Gracias a Dios | Puerto Lempira | Suhi        | Resting collection | Culicidae | <i>Anopheles</i> | <i>Nyssorhyncus</i> | <i>albimanus</i>     | NEG           |
| 93  | HND-2021-GAD-023-0149 | Gracias a Dios | Puerto Lempira | Suhi        | Resting collection | Culicidae | <i>Anopheles</i> | <i>Nyssorhyncus</i> | <i>albimanus</i>     | NEG           |
| 94  | HND-2021-GAD-023-0150 | Gracias a Dios | Puerto Lempira | Suhi        | Resting collection | Culicidae | <i>Anopheles</i> | <i>Nyssorhyncus</i> | <i>albimanus</i>     | NEG           |
| 95  | HND-2021-GAD-023-0151 | Gracias a Dios | Puerto Lempira | Suhi        | Resting collection | Culicidae | <i>Anopheles</i> | <i>Nyssorhyncus</i> | <i>albimanus</i>     | Not processed |
| 96  | HND-2021-GAD-023-0152 | Gracias a Dios | Puerto Lempira | Suhi        | Resting collection | Culicidae | <i>Anopheles</i> | <i>Nyssorhyncus</i> | <i>albimanus</i>     | Not processed |
| 97  | HND-2021-GAD-023-0153 | Gracias a Dios | Puerto Lempira | Suhi        | Resting collection | Culicidae | <i>Anopheles</i> | <i>Nyssorhyncus</i> | <i>albimanus</i>     | Not processed |
| 98  | HND-2021-GAD-023-0154 | Gracias a Dios | Puerto Lempira | Suhi        | Resting collection | Culicidae | <i>Anopheles</i> | <i>Nyssorhyncus</i> | <i>albimanus</i>     | NEG           |
| 99  | HND-2021-GAD-023-0155 | Gracias a Dios | Puerto Lempira | Suhi        | Resting collection | Culicidae | <i>Anopheles</i> | <i>Nyssorhyncus</i> | <i>albimanus</i>     | NEG           |
| 100 | HND-2021-GAD-023-0156 | Gracias a Dios | Puerto Lempira | Suhi        | Resting collection | Culicidae | <i>Anopheles</i> | <i>Nyssorhyncus</i> | <i>albimanus</i>     | NEG           |
| 101 | HND-2021-GAD-023-0157 | Gracias a Dios | Puerto Lempira | Suhi        | Resting collection | Culicidae | <i>Anopheles</i> | <i>Nyssorhyncus</i> | <i>albimanus</i>     | NEG           |
| 102 | HND-2021-GAD-023-0158 | Gracias a Dios | Puerto Lempira | Suhi        | Resting collection | Culicidae | <i>Anopheles</i> | <i>Nyssorhyncus</i> | <i>albimanus</i>     | NEG           |
| 103 | HND-2021-GAD-023-0159 | Gracias a Dios | Puerto Lempira | Suhi        | Resting collection | Culicidae | <i>Anopheles</i> | <i>Nyssorhyncus</i> | <i>albimanus</i>     | NEG           |
| 104 | HND-2021-GAD-023-0160 | Gracias a Dios | Puerto Lempira | Suhi        | Resting collection | Culicidae | <i>Anopheles</i> | <i>Nyssorhyncus</i> | <i>albimanus</i>     | Not processed |

|     |                       |                |                |      |                    |           |                  |                     |                        |               |
|-----|-----------------------|----------------|----------------|------|--------------------|-----------|------------------|---------------------|------------------------|---------------|
| 105 | HND-2021-GAD-023-0161 | Gracias a Dios | Puerto Lempira | Suhi | Resting collection | Culicidae | <i>Anopheles</i> | <i>Nyssorhyncus</i> | <i>albimanus</i>       | Not processed |
| 106 | HND-2021-GAD-023-0162 | Gracias a Dios | Puerto Lempira | Suhi | Resting collection | Culicidae | <i>Anopheles</i> | <i>Nyssorhyncus</i> | <i>albimanus</i>       | Not processed |
| 107 | HND-2021-GAD-023-0163 | Gracias a Dios | Puerto Lempira | Suhi | Resting collection | Culicidae | <i>Anopheles</i> | <i>Nyssorhyncus</i> | <i>albimanus</i>       | NEG           |
| 108 | HND-2021-GAD-023-0164 | Gracias a Dios | Puerto Lempira | Suhi | Resting collection | Culicidae | <i>Anopheles</i> | <i>Nyssorhyncus</i> | <i>albimanus</i>       | NEG           |
| 109 | HND-2021-GAD-023-0165 | Gracias a Dios | Puerto Lempira | Suhi | Resting collection | Culicidae | <i>Anopheles</i> | <i>Nyssorhyncus</i> | <i>albimanus</i>       | NEG           |
| 110 | HND-2021-GAD-023-0166 | Gracias a Dios | Puerto Lempira | Suhi | Resting collection | Culicidae | <i>Anopheles</i> | <i>Nyssorhyncus</i> | <i>albimanus</i>       | NEG           |
| 111 | HND-2021-GAD-023-0167 | Gracias a Dios | Puerto Lempira | Suhi | Resting collection | Culicidae | <i>Anopheles</i> | <i>Nyssorhyncus</i> | <i>albimanus</i>       | NEG           |
| 112 | HND-2021-GAD-023-0168 | Gracias a Dios | Puerto Lempira | Suhi | Resting collection | Culicidae | <i>Anopheles</i> | <i>Nyssorhyncus</i> | <i>albimanus</i>       | NEG           |
| 113 | HND-2021-GAD-023-0169 | Gracias a Dios | Puerto Lempira | Suhi | Resting collection | Culicidae | <i>Anopheles</i> | <i>Nyssorhyncus</i> | <i>albimanus</i>       | Not processed |
| 114 | HND-2021-GAD-023-0170 | Gracias a Dios | Puerto Lempira | Suhi | Resting collection | Culicidae | <i>Anopheles</i> | <i>Nyssorhyncus</i> | <i>albimanus</i>       | Not processed |
| 115 | HND-2021-GAD-023-0171 | Gracias a Dios | Puerto Lempira | Suhi | Resting collection | Culicidae | <i>Anopheles</i> | <i>Nyssorhyncus</i> | <i>albimanus</i>       | NEG           |
| 116 | HND-2021-GAD-023-0172 | Gracias a Dios | Puerto Lempira | Suhi | Resting collection | Culicidae | <i>Anopheles</i> | <i>Nyssorhyncus</i> | <i>albimanus</i>       | NEG           |
| 117 | HND-2021-GAD-023-0173 | Gracias a Dios | Puerto Lempira | Suhi | Resting collection | Culicidae | <i>Anopheles</i> | <i>Nyssorhyncus</i> | <i>albimanus</i>       | NEG           |
| 118 | HND-2021-GAD-023-0174 | Gracias a Dios | Puerto Lempira | Suhi | Resting collection | Culicidae | <i>Anopheles</i> | <i>Nyssorhyncus</i> | <i>albimanus</i>       | NEG           |
| 119 | HND-2021-GAD-023-0175 | Gracias a Dios | Puerto Lempira | Suhi | Resting collection | Culicidae | <i>Anopheles</i> | <i>Nyssorhyncus</i> | <i>albimanus</i>       | NEG           |
| 120 | HND-2021-GAD-023-0176 | Gracias a Dios | Puerto Lempira | Suhi | Resting collection | Culicidae | <i>Anopheles</i> | <i>Nyssorhyncus</i> | <i>albimanus</i>       | NEG           |
| 121 | HND-2021-GAD-023-0177 | Gracias a Dios | Puerto Lempira | Suhi | Resting collection | Culicidae | <i>Anopheles</i> | <i>Anopheles</i>    | <i>vestitipennis</i>   | NEG           |
| 122 | HND-2021-GAD-023-0178 | Gracias a Dios | Puerto Lempira | Suhi | Resting collection | Culicidae | <i>Anopheles</i> | <i>Anopheles</i>    | <i>vestitipennis</i>   | NEG           |
| 123 | HND-2021-GAD-023-0179 | Gracias a Dios | Puerto Lempira | Suhi | Resting collection | Culicidae | <i>Anopheles</i> | <i>Anopheles</i>    | <i>vestitipennis</i>   | NEG           |
| 124 | HND-2021-GAD-023-0180 | Gracias a Dios | Puerto Lempira | Suhi | Resting collection | Culicidae | <i>Anopheles</i> | <i>Anopheles</i>    | <i>vestitipennis</i>   | Not processed |
| 125 | HND-2021-GAD-023-0181 | Gracias a Dios | Puerto Lempira | Suhi | Resting collection | Culicidae | <i>Anopheles</i> | <i>Anopheles</i>    | <i>vestitipennis</i>   | Not processed |
| 126 | HND-2021-GAD-023-0182 | Gracias a Dios | Puerto Lempira | Suhi | Resting collection | Culicidae | <i>Anopheles</i> | <i>Anopheles</i>    | <i>neomaculipalpus</i> | Not processed |
| 127 | HND-2021-GAD-023-0183 | Gracias a Dios | Puerto Lempira | Suhi | Resting collection | Culicidae | <i>Anopheles</i> | <i>Anopheles</i>    | <i>neomaculipalpus</i> | NEG           |
| 128 | HND-2021-GAD-023-0184 | Gracias a Dios | Puerto Lempira | Suhi | Resting collection | Culicidae | <i>Anopheles</i> | <i>Anopheles</i>    | <i>neomaculipalpus</i> | NEG           |
| 129 | HND-2021-GAD-023-0185 | Gracias a Dios | Puerto Lempira | Suhi | Resting collection | Culicidae | <i>Anopheles</i> | <i>Anopheles</i>    | <i>apicimacula</i>     | NEG           |
| 130 | HND-2021-GAD-023-0186 | Gracias a Dios | Puerto Lempira | Suhi | Resting collection | Culicidae | <i>Anopheles</i> | <i>Nyssorhyncus</i> | <i>apicimacula</i>     | NEG           |
| 131 | HND-2021-GAD-023-0187 | Gracias a Dios | Puerto Lempira | Suhi | Resting collection | Culicidae | <i>Anopheles</i> | <i>Anopheles</i>    | <i>punctimacula</i>    | NEG           |

|     |                       |                |                |      |                    |           |                  |                     |                        |               |
|-----|-----------------------|----------------|----------------|------|--------------------|-----------|------------------|---------------------|------------------------|---------------|
| 132 | HND-2021-GAD-023-0188 | Gracias a Dios | Puerto Lempira | Suhi | Resting collection | Culicidae | <i>Anopheles</i> | <i>Anopheles</i>    | <i>neomaculipalpus</i> | NEG           |
| 133 | HND-2021-GAD-023-0189 | Gracias a Dios | Puerto Lempira | Suhi | Resting collection | Culicidae | <i>Anopheles</i> | <i>Nyssorhyncus</i> | <i>apicimacula</i>     | NEG           |
| 134 | HND-2021-GAD-023-0190 | Gracias a Dios | Puerto Lempira | Suhi | Resting collection | Culicidae | <i>Anopheles</i> | <i>Anopheles</i>    | <i>vestitipennis</i>   | NEG           |
| 135 | HND-2021-GAD-023-0191 | Gracias a Dios | Puerto Lempira | Suhi | Resting collection | Culicidae | <i>Anopheles</i> | <i>Anopheles</i>    | <i>crucians</i>        | NEG           |
| 136 | HND-2021-GAD-023-0192 | Gracias a Dios | Puerto Lempira | Suhi | Resting collection | Culicidae | <i>Anopheles</i> | <i>Anopheles</i>    | <i>crucians</i>        | NEG           |
| 137 | HND-2021-GAD-023-0193 | Gracias a Dios | Puerto Lempira | Suhi | Resting collection | Culicidae | <i>Anopheles</i> | <i>Nyssorhyncus</i> | <i>albimanus</i>       | Not processed |
| 138 | HND-2021-GAD-023-0194 | Gracias a Dios | Puerto Lempira | Suhi | Resting collection | Culicidae | <i>Anopheles</i> | <i>Anopheles</i>    | <i>crucians</i>        | NEG           |
| 139 | HND-2021-GAD-023-0196 | Gracias a Dios | Puerto Lempira | Suhi | Resting collection | Culicidae | <i>Anopheles</i> | <i>Anopheles</i>    | <i>crucians</i>        | Not processed |
| 140 | HND-2021-GAD-023-0197 | Gracias a Dios | Puerto Lempira | Suhi | Resting collection | Culicidae | <i>Anopheles</i> | <i>Anopheles</i>    | <i>crucians</i>        | Not processed |
| 141 | HND-2021-GAD-023-0198 | Gracias a Dios | Puerto Lempira | Suhi | Resting collection | Culicidae | <i>Anopheles</i> | <i>Anopheles</i>    | <i>crucians</i>        | Not processed |
| 142 | HND-2021-GAD-023-0199 | Gracias a Dios | Puerto Lempira | Suhi | Resting collection | Culicidae | <i>Anopheles</i> | <i>Anopheles</i>    | <i>crucians</i>        | NEG           |
| 143 | HND-2021-GAD-023-0200 | Gracias a Dios | Puerto Lempira | Suhi | Resting collection | Culicidae | <i>Anopheles</i> | <i>Anopheles</i>    | <i>vestitipennis</i>   | NEG           |
| 144 | HND-2021-GAD-023-0201 | Gracias a Dios | Puerto Lempira | Suhi | Resting collection | Culicidae | <i>Anopheles</i> | <i>Anopheles</i>    | <i>crucians</i>        | NEG           |
| 145 | HND-2021-GAD-023-0202 | Gracias a Dios | Puerto Lempira | Suhi | Resting collection | Culicidae | <i>Anopheles</i> | <i>Anopheles</i>    | <i>neomaculipalpus</i> | NEG           |
| 146 | HND-2021-GAD-023-0203 | Gracias a Dios | Puerto Lempira | Suhi | Resting collection | Culicidae | <i>Anopheles</i> | <i>Nyssorhyncus</i> | <i>albimanus</i>       | NEG           |
| 147 | HND-2021-GAD-023-0204 | Gracias a Dios | Puerto Lempira | Suhi | Resting collection | Culicidae | <i>Anopheles</i> | <i>Nyssorhyncus</i> | <i>albimanus</i>       | Not processed |
| 148 | HND-2021-GAD-023-0205 | Gracias a Dios | Puerto Lempira | Suhi | Resting collection | Culicidae | <i>Anopheles</i> | <i>Nyssorhyncus</i> | <i>albimanus</i>       | Not processed |
| 149 | HND-2021-GAD-023-0206 | Gracias a Dios | Puerto Lempira | Suhi | Resting collection | Culicidae | <i>Anopheles</i> | <i>Anopheles</i>    | <i>neomaculipalpus</i> | NEG           |
| 150 | HND-2021-GAD-023-0207 | Gracias a Dios | Puerto Lempira | Suhi | Resting collection | Culicidae | <i>Anopheles</i> | <i>Nyssorhyncus</i> | <i>argyritarsis</i>    | NEG           |
| 151 | HND-2021-GAD-023-0208 | Gracias a Dios | Puerto Lempira | Suhi | Resting collection | Culicidae | <i>Anopheles</i> | <i>Nyssorhyncus</i> | <i>albimanus</i>       | Not processed |
| 152 | HND-2021-GAD-023-0209 | Gracias a Dios | Puerto Lempira | Suhi | Resting collection | Culicidae | <i>Anopheles</i> | <i>Nyssorhyncus</i> | <i>albimanus</i>       | Not processed |
| 153 | HND-2021-GAD-023-0210 | Gracias a Dios | Puerto Lempira | Suhi | Resting collection | Culicidae | <i>Anopheles</i> | <i>Nyssorhyncus</i> | <i>albimanus</i>       | Not processed |
| 154 | HND-2021-GAD-023-0211 | Gracias a Dios | Puerto Lempira | Suhi | Resting collection | Culicidae | <i>Anopheles</i> | <i>Nyssorhyncus</i> | <i>albimanus</i>       | Not processed |
| 155 | HND-2021-GAD-023-0212 | Gracias a Dios | Puerto Lempira | Suhi | Resting collection | Culicidae | <i>Anopheles</i> | <i>Nyssorhyncus</i> | <i>albimanus</i>       | Not processed |
| 156 | HND-2021-GAD-023-0213 | Gracias a Dios | Puerto Lempira | Suhi | Resting collection | Culicidae | <i>Anopheles</i> | <i>Nyssorhyncus</i> | <i>albimanus</i>       | NEG           |
| 157 | HND-2021-GAD-023-0214 | Gracias a Dios | Puerto Lempira | Suhi | Resting collection | Culicidae | <i>Anopheles</i> | <i>Nyssorhyncus</i> | <i>albimanus</i>       | NEG           |
| 158 | HND-2021-GAD-023-0215 | Gracias a Dios | Puerto Lempira | Suhi | Resting collection | Culicidae | <i>Anopheles</i> | <i>Nyssorhyncus</i> | <i>albimanus</i>       | NEG           |

[illegible]

|     |                       |                |                |      |                    |           |                  |                     |                        |               |
|-----|-----------------------|----------------|----------------|------|--------------------|-----------|------------------|---------------------|------------------------|---------------|
| 186 | HND-2021-GAD-023-0244 | Gracias a Dios | Puerto Lempira | Suhi | Resting collection | Culicidae | <i>Anopheles</i> | <i>Anopheles</i>    | <i>crucians</i>        | NEG           |
| 187 | HND-2021-GAD-023-0245 | Gracias a Dios | Puerto Lempira | Suhi | Resting collection | Culicidae | <i>Anopheles</i> | <i>Nyssorhyncus</i> | <i>albimanus</i>       | NEG           |
| 188 | HND-2021-GAD-023-0254 | Gracias a Dios | Puerto Lempira | Suhi | Resting collection | Culicidae | <i>Anopheles</i> | <i>Anopheles</i>    | <i>neomaculipalpus</i> | NEG           |
| 189 | HND-2021-GAD-023-0255 | Gracias a Dios | Puerto Lempira | Suhi | Resting collection | Culicidae | <i>Anopheles</i> | <i>Anopheles</i>    | <i>neomaculipalpus</i> | NEG           |
| 190 | HND-2021-GAD-023-0256 | Gracias a Dios | Puerto Lempira | Suhi | Resting collection | Culicidae | <i>Anopheles</i> | <i>Anopheles</i>    | <i>punctimacula</i>    | NEG           |
| 191 | HND-2021-GAD-023-0257 | Gracias a Dios | Puerto Lempira | Suhi | Resting collection | Culicidae | <i>Anopheles</i> | <i>Anopheles</i>    | <i>neomaculipalpus</i> | NEG           |
| 192 | HND-2021-GAD-023-0259 | Gracias a Dios | Puerto Lempira | Suhi | Resting collection | Culicidae | <i>Anopheles</i> | <i>Anopheles</i>    | <i>neomaculipalpus</i> | NEG           |
| 193 | HND-2021-GAD-023-0260 | Gracias a Dios | Puerto Lempira | Suhi | Resting collection | Culicidae | <i>Anopheles</i> | <i>Anopheles</i>    | <i>neomaculipalpus</i> | NEG           |
| 194 | HND-2021-GAD-023-0261 | Gracias a Dios | Puerto Lempira | Suhi | Resting collection | Culicidae | <i>Anopheles</i> | <i>Nyssorhyncus</i> | <i>albimanus</i>       | NEG           |
| 195 | HND-2021-GAD-023-0262 | Gracias a Dios | Puerto Lempira | Suhi | Resting collection | Culicidae | <i>Anopheles</i> | <i>Nyssorhyncus</i> | <i>albimanus</i>       | Not processed |
| 196 | HND-2021-GAD-023-0263 | Gracias a Dios | Puerto Lempira | Suhi | Resting collection | Culicidae | <i>Anopheles</i> | <i>Nyssorhyncus</i> | <i>albimanus</i>       | NEG           |
| 197 | HND-2021-GAD-023-0264 | Gracias a Dios | Puerto Lempira | Suhi | Resting collection | Culicidae | <i>Anopheles</i> | <i>Nyssorhyncus</i> | <i>albimanus</i>       | Not processed |
| 198 | HND-2021-GAD-023-0266 | Gracias a Dios | Puerto Lempira | Suhi | Resting collection | Culicidae | <i>Anopheles</i> | <i>Nyssorhyncus</i> | <i>albimanus</i>       | Not processed |
| 199 | HND-2021-GAD-023-0267 | Gracias a Dios | Puerto Lempira | Suhi | Resting collection | Culicidae | <i>Anopheles</i> | <i>Nyssorhyncus</i> | <i>albimanus</i>       | Not processed |
| 200 | HND-2021-GAD-023-0268 | Gracias a Dios | Puerto Lempira | Suhi | Resting collection | Culicidae | <i>Anopheles</i> | <i>Nyssorhyncus</i> | <i>albimanus</i>       | Not processed |
| 201 | HND-2021-GAD-023-0269 | Gracias a Dios | Puerto Lempira | Suhi | Resting collection | Culicidae | <i>Anopheles</i> | <i>Nyssorhyncus</i> | <i>albimanus</i>       | Not processed |
| 202 | HND-2021-GAD-023-0270 | Gracias a Dios | Puerto Lempira | Suhi | Resting collection | Culicidae | <i>Anopheles</i> | <i>Nyssorhyncus</i> | <i>albimanus</i>       | Not processed |
| 203 | HND-2021-GAD-023-0271 | Gracias a Dios | Puerto Lempira | Suhi | Resting collection | Culicidae | <i>Anopheles</i> | <i>Nyssorhyncus</i> | <i>albimanus</i>       | Not processed |
| 204 | HND-2021-GAD-023-0272 | Gracias a Dios | Puerto Lempira | Suhi | Resting collection | Culicidae | <i>Anopheles</i> | <i>Nyssorhyncus</i> | <i>albimanus</i>       | Not processed |
| 205 | HND-2021-GAD-023-0273 | Gracias a Dios | Puerto Lempira | Suhi | Resting collection | Culicidae | <i>Anopheles</i> | <i>Nyssorhyncus</i> | <i>albimanus</i>       | Not processed |
| 206 | HND-2021-GAD-023-0276 | Gracias a Dios | Puerto Lempira | Suhi | Resting collection | Culicidae | <i>Anopheles</i> | <i>Anopheles</i>    | <i>crucians</i>        | NEG           |
| 207 | HND-2021-GAD-023-0277 | Gracias a Dios | Puerto Lempira | Suhi | Resting collection | Culicidae | <i>Anopheles</i> | <i>Nyssorhyncus</i> | <i>albimanus</i>       | Not processed |
| 208 | HND-2021-GAD-023-0278 | Gracias a Dios | Puerto Lempira | Suhi | Resting collection | Culicidae | <i>Anopheles</i> | <i>Nyssorhyncus</i> | <i>albimanus</i>       | Not processed |
| 209 | HND-2021-GAD-023-0279 | Gracias a Dios | Puerto Lempira | Suhi | Resting collection | Culicidae | <i>Anopheles</i> | <i>Nyssorhyncus</i> | <i>albimanus</i>       | Not processed |
| 210 | HND-2021-GAD-023-0280 | Gracias a Dios | Puerto Lempira | Suhi | Resting collection | Culicidae | <i>Anopheles</i> | <i>Nyssorhyncus</i> | <i>albimanus</i>       | Not processed |
| 211 | HND-2021-GAD-023-0281 | Gracias a Dios | Puerto Lempira | Suhi | Resting collection | Culicidae | <i>Anopheles</i> | <i>Nyssorhyncus</i> | <i>argyritarsis</i>    | NEG           |
| 212 | HND-2018-COM-024-0282 | Comayagua      | Comayagua      |      | Shannon trap       | Culicidae | <i>Anopheles</i> | <i>Nyssorhyncus</i> | <i>albimanus</i>       | NEG           |



|     |                       |            |             |                                     |                    |           |                  |                     |                           |     |
|-----|-----------------------|------------|-------------|-------------------------------------|--------------------|-----------|------------------|---------------------|---------------------------|-----|
| 213 | HND-2018-COM-024-0283 | Comayagua  | Comayagua   |                                     | CDC Light Trap     | Culicidae | <i>Anopheles</i> | <i>Nyssorhyncus</i> | <i>albimanus</i>          | NEG |
| 214 | HND-2018-COM-024-0284 | Comayagua  | Comayagua   |                                     | CDC Light Trap     | Culicidae | <i>Anopheles</i> | <i>Nyssorhyncus</i> | <i>albimanus</i>          | NEG |
| 215 | HND-2018-COM-024-0285 | Comayagua  | Comayagua   |                                     | CDC Light Trap     | Culicidae | <i>Anopheles</i> | <i>Nyssorhyncus</i> | <i>albimanus</i>          | NEG |
| 216 | HND-2018-COM-024-0286 | Comayagua  | La Libertad | Gracias a Dios                      | Resting collection | Culicidae | <i>Anopheles</i> | <i>Anopheles</i>    | <i>pseudopunctipennis</i> | NEG |
| 217 | HND-2018-COM-024-0287 | Comayagua  | La Libertad | Gracias a Dios                      | Resting collection | Culicidae | <i>Anopheles</i> | <i>Anopheles</i>    | <i>pseudopunctipennis</i> | NEG |
| 218 | HND-2019-COM-024-0288 | Comayagua  | Comayagua   | Aldea Fátima, San Jeronimo          | Resting collection | Culicidae | <i>Anopheles</i> | <i>Anopheles</i>    | <i>pseudopunctipennis</i> | NEG |
| 219 | HND-2019-COM-024-0289 | Comayagua  | Comayagua   | Aldea Fátima, San Jeronimo          | Resting collection | Culicidae | <i>Anopheles</i> | <i>Anopheles</i>    | <i>pseudopunctipennis</i> | NEG |
| 220 | HND-2019-COM-024-0290 | Comayagua  | Comayagua   | Aldea Fátima, San Jeronimo          | Resting collection | Culicidae | <i>Anopheles</i> | <i>Anopheles</i>    | <i>pseudopunctipennis</i> | NEG |
| 221 | HND-2019-COM-024-0291 | Comayagua  | Comayagua   | Aldea Fátima, San Jeronimo          | Resting collection | Culicidae | <i>Anopheles</i> | <i>Anopheles</i>    | <i>pseudopunctipennis</i> | NEG |
| 222 | HND-2019-COM-024-0292 | Comayagua  | Comayagua   | Aldea Fátima, San Jeronimo          | Resting collection | Culicidae | <i>Anopheles</i> | <i>Anopheles</i>    | <i>pseudopunctipennis</i> | NEG |
| 223 | HND-2019-COM-024-0293 | Comayagua  | Comayagua   | Aldea Fátima, San Jeronimo          | Resting collection | Culicidae | <i>Anopheles</i> | <i>Anopheles</i>    | <i>pseudopunctipennis</i> | NEG |
| 224 | HND-2019-COM-024-0294 | El Paraíso | Moroceli    | Barrio El Jicaro, Aldea Guadalajara | CDC Light Trap     | Culicidae | <i>Anopheles</i> | <i>Nyssorhyncus</i> | <i>albimanus</i>          | NEG |
| 225 | HND-2019-COM-024-0295 | El Paraíso | Moroceli    | Barrio El Jicaro, Aldea Guadalajara | Resting collection | Culicidae | <i>Anopheles</i> | <i>Nyssorhyncus</i> | <i>albimanus</i>          | NEG |
| 226 | HND-2019-COM-024-0296 | El Paraíso | Moroceli    | Barrio El Jicaro, Aldea Guadalajara | Resting collection | Culicidae | <i>Anopheles</i> | <i>Nyssorhyncus</i> | <i>albimanus</i>          | NEG |
| 227 | HND-2019-COM-024-0297 | El Paraíso | Moroceli    | Barrio El Jicaro, Aldea Guadalajara | Resting collection | Culicidae | <i>Anopheles</i> | <i>Nyssorhyncus</i> | <i>albimanus</i>          | NEG |
| 228 | HND-2019-COM-024-0298 | El Paraíso | Moroceli    | Barrio El Jicaro, Aldea Guadalajara | Resting collection | Culicidae | <i>Anopheles</i> | <i>Nyssorhyncus</i> | <i>albimanus</i>          | NEG |
| 229 | HND-2019-COM-024-0299 | El Paraíso | Moroceli    | Barrio El Jicaro, Aldea Guadalajara | Resting collection | Culicidae | <i>Anopheles</i> | <i>Nyssorhyncus</i> | <i>albimanus</i>          | NEG |
| 230 | HND-2019-COM-024-0300 | El Paraíso | Moroceli    | Barrio El Jicaro, Aldea Guadalajara | Resting collection | Culicidae | <i>Anopheles</i> | <i>Nyssorhyncus</i> | <i>albimanus</i>          | NEG |
| 231 | HND-2019-COM-024-0301 | El Paraíso | Moroceli    | Barrio El Jicaro, Aldea Guadalajara | Resting collection | Culicidae | <i>Anopheles</i> | <i>Nyssorhyncus</i> | <i>albimanus</i>          | NEG |
| 232 | HND-2019-COM-024-0302 | El Paraíso | Moroceli    | Barrio El Jicaro, Aldea Guadalajara | Resting collection | Culicidae | <i>Anopheles</i> | <i>Nyssorhyncus</i> | <i>albimanus</i>          | NEG |
| 233 | HND-2019-COM-024-0303 | El Paraíso | Moroceli    | Barrio El Jicaro, Aldea Guadalajara | Resting collection | Culicidae | <i>Anopheles</i> | <i>Nyssorhyncus</i> | <i>albimanus</i>          | NEG |
| 234 | HND-2019-COM-024-0304 | El Paraíso | Moroceli    | Barrio El Jicaro, Aldea Guadalajara | Resting collection | Culicidae | <i>Anopheles</i> | <i>Nyssorhyncus</i> | <i>albimanus</i>          | NEG |
| 235 | HND-2019-COM-024-0305 | El Paraíso | Moroceli    | Barrio El Jicaro, Aldea Guadalajara | Resting collection | Culicidae | <i>Anopheles</i> | <i>Nyssorhyncus</i> | <i>albimanus</i>          | NEG |

|     |                       |                   |                        |                                        |                    |           |                  |                     |                           |     |
|-----|-----------------------|-------------------|------------------------|----------------------------------------|--------------------|-----------|------------------|---------------------|---------------------------|-----|
| 236 | HND-2019-COM-024-0306 | El Paraíso        | Moroceli               | Barrio El Jicaro,<br>Aldea Guadalajara | Resting collection | Culicidae | <i>Anopheles</i> | <i>Nyssorhyncus</i> | <i>albimanus</i>          | NEG |
| 237 | HND-2019-COM-024-0307 | El Paraíso        | Moroceli               | Barrio El Jicaro,<br>Aldea Guadalajara | Resting collection | Culicidae | <i>Anopheles</i> | <i>Nyssorhyncus</i> | <i>albimanus</i>          | NEG |
| 238 | HND-2019-COM-024-0308 | El Paraíso        | Moroceli               | Barrio El Jicaro,<br>Aldea Guadalajara | Resting collection | Culicidae | <i>Anopheles</i> | <i>Nyssorhyncus</i> | <i>albimanus</i>          | NEG |
| 239 | HND-2019-COM-024-0309 | El Paraíso        | Moroceli               | Barrio El Jicaro,<br>Aldea Guadalajara | Resting collection | Culicidae | <i>Anopheles</i> | <i>Nyssorhyncus</i> | <i>albimanus</i>          | NEG |
| 240 | HND-2019-COM-024-0310 | El Paraíso        | Moroceli               | Barrio El Jicaro,<br>Aldea Guadalajara | Resting collection | Culicidae | <i>Anopheles</i> | <i>Nyssorhyncus</i> | <i>albimanus</i>          | NEG |
| 241 | HND-2019-COM-024-0311 | El Paraíso        | Moroceli               | Barrio El Jicaro,<br>Aldea Guadalajara | Resting collection | Culicidae | <i>Anopheles</i> | <i>Nyssorhyncus</i> | <i>albimanus</i>          | NEG |
| 242 | HND-2019-COM-024-0312 | El Paraíso        | Moroceli               | Barrio El Jicaro,<br>Aldea Guadalajara | Resting collection | Culicidae | <i>Anopheles</i> | <i>Nyssorhyncus</i> | <i>albimanus</i>          | NEG |
| 243 | HND-2019-COM-024-0316 | Comayagua         | Comayagua              |                                        | CDC Light Trap     | Culicidae | <i>Anopheles</i> | <i>Nyssorhyncus</i> | <i>albimanus</i>          | NEG |
| 244 | HND-2019-COM-024-0317 | Comayagua         | Comayagua              |                                        | BG Sentinel        | Culicidae | <i>Anopheles</i> | <i>Nyssorhyncus</i> | <i>albimanus</i>          | NEG |
| 245 | HND-2020-COM-024-0318 | Comayagua         | Comayagua              |                                        | CDC Light Trap     | Culicidae | <i>Anopheles</i> | <i>Nyssorhyncus</i> | <i>albimanus</i>          | NEG |
| 246 | HND-2020-COM-024-0321 | Comayagua         | Comayagua              |                                        | CDC Light Trap     | Culicidae | <i>Anopheles</i> | <i>Anopheles</i>    | <i>pseudopunctipennis</i> | NEG |
| 247 | HND-2021-COM-024-0322 | Cortés            | Santa Cruz de<br>Yojoa | San Antonio de Yure                    | CDC Light Trap     | Culicidae | <i>Anopheles</i> | <i>Nyssorhyncus</i> | <i>albimanus</i>          | NEG |
| 248 | HND-2021-COM-024-0323 | Comayagua         | San Jose de C.         | Barrio Montefresco                     | CDC Light Trap     | Culicidae | <i>Anopheles</i> | <i>Nyssorhyncus</i> | <i>argyritarsis</i>       | NEG |
| 249 | HND-2021-COM-024-0324 | Comayagua         | San Jose de C.         | Barrio Montefresco                     | CDC Light Trap     | Culicidae | <i>Anopheles</i> | <i>Nyssorhyncus</i> | <i>argyritarsis</i>       | NEG |
| 250 | HND-2021-COM-024-0325 | Comayagua         | San Jose de C.         | Barrio Montefresco                     | CDC Light Trap     | Culicidae | <i>Anopheles</i> | <i>Nyssorhyncus</i> | <i>argyritarsis</i>       | NEG |
| 251 | HND-2021-COM-024-0326 | Comayagua         | San Jose de C.         | Barrio Montefresco                     | CDC Light Trap     | Culicidae | <i>Anopheles</i> | <i>Nyssorhyncus</i> | <i>argyritarsis</i>       | NEG |
| 252 | HND-2021-COM-024-0327 | Comayagua         | San Jose de C.         | Barrio Montefresco                     | CDC Light Trap     | Culicidae | <i>Anopheles</i> | <i>Nyssorhyncus</i> | <i>argyritarsis</i>       | NEG |
| 253 | HND-2021-COM-024-0328 | Comayagua         | San Jose de C.         | Barrio Montefresco                     | CDC Light Trap     | Culicidae | <i>Anopheles</i> | <i>Nyssorhyncus</i> | <i>argyritarsis</i>       | NEG |
| 254 | HND-2021-COM-024-0329 | Comayagua         | San Jose de C.         | Barrio Montefresco                     | CDC Light Trap     | Culicidae | <i>Anopheles</i> | <i>Nyssorhyncus</i> | <i>argyritarsis</i>       | NEG |
| 255 | HND-2021-COM-024-0330 | Cortés            | Pimienta               | Colonia Barahona                       | CDC Light Trap     | Culicidae | <i>Anopheles</i> | <i>Nyssorhyncus</i> | <i>albimanus</i>          | NEG |
| 256 | HND-2021-COM-024-0331 | Cortés            | Pimienta               | Colonia Barahona                       | CDC Light Trap     | Culicidae | <i>Anopheles</i> | <i>Nyssorhyncus</i> | <i>albimanus</i>          | NEG |
| 257 | HND-2021-IB-025-0332  | Islas de la Bahía | Roatan                 | Sandy Bay                              | Resting collection | Culicidae | <i>Anopheles</i> | <i>Nyssorhyncus</i> | <i>albimanus</i>          | NEG |
| 258 | HND-2021-IB-025-0333  | Islas de la Bahía | Roatan                 | Sandy Bay                              | Resting collection | Culicidae | <i>Anopheles</i> | <i>Nyssorhyncus</i> | <i>albimanus</i>          | NEG |
| 259 | HND-2021-IB-025-0334  | Islas de la Bahía | Roatan                 | Sandy Bay                              | Resting collection | Culicidae | <i>Anopheles</i> | <i>Nyssorhyncus</i> | <i>albimanus</i>          | NEG |
| 260 | HND-2021-IB-025-0335  | Islas de la Bahía | Roatan                 | Sandy Bay                              | Resting collection | Culicidae | <i>Anopheles</i> | <i>Nyssorhyncus</i> | <i>albimanus</i>          | NEG |

[illegible]

|     |                       |                   |                     |                                     |                    |           |                  |                     |                           |     |
|-----|-----------------------|-------------------|---------------------|-------------------------------------|--------------------|-----------|------------------|---------------------|---------------------------|-----|
| 288 | HND-2021-IB-025-0364  | Islas de la Bahía | Roatan              | Sandy Bay                           | Resting collection | Culicidae | <i>Anopheles</i> | <i>Nyssorhyncus</i> | <i>albimanus</i>          | NEG |
| 289 | HND-2019-COM-024-0289 | Comayagua         | Comayagua           | Aldea Fátima, San Jeronimo          | Resting collection | Culicidae | <i>Anopheles</i> | <i>Anopheles</i>    | <i>pseudopunctipennis</i> | NEG |
| 290 | HND-2019-COM-024-0290 | Comayagua         | Comayagua           | Aldea Fátima, San Jeronimo          | Resting collection | Culicidae | <i>Anopheles</i> | <i>Anopheles</i>    | <i>pseudopunctipennis</i> | NEG |
| 291 | HND-2019-COM-024-0291 | Comayagua         | Comayagua           | Aldea Fátima, San Jeronimo          | Resting collection | Culicidae | <i>Anopheles</i> | <i>Anopheles</i>    | <i>pseudopunctipennis</i> | NEG |
| 292 | HND-2019-COM-024-0292 | Comayagua         | Comayagua           | Aldea Fátima, San Jeronimo          | Resting collection | Culicidae | <i>Anopheles</i> | <i>Anopheles</i>    | <i>pseudopunctipennis</i> | NEG |
| 293 | HND-2019-COM-024-0293 | Comayagua         | Comayagua           | Aldea Fátima, San Jeronimo          | Resting collection | Culicidae | <i>Anopheles</i> | <i>Anopheles</i>    | <i>pseudopunctipennis</i> | NEG |
| 294 | HND-2019-COM-024-0294 | El Paraíso        | Moroceli            | Barrio El Jicaró, Aldea Guadalajara | CDC Light Trap     | Culicidae | <i>Anopheles</i> | <i>Nyssorhyncus</i> | <i>albimanus</i>          | NEG |
| 295 | HND-2019-COM-024-0295 | El Paraíso        | Moroceli            | Barrio El Jicaró, Aldea Guadalajara | Resting collection | Culicidae | <i>Anopheles</i> | <i>Nyssorhyncus</i> | <i>albimanus</i>          | NEG |
| 296 | HND-2019-COM-024-0296 | El Paraíso        | Moroceli            | Barrio El Jicaró, Aldea Guadalajara | Resting collection | Culicidae | <i>Anopheles</i> | <i>Nyssorhyncus</i> | <i>albimanus</i>          | NEG |
| 297 | HND-2019-COM-024-0297 | El Paraíso        | Moroceli            | Barrio El Jicaró, Aldea Guadalajara | Resting collection | Culicidae | <i>Anopheles</i> | <i>Nyssorhyncus</i> | <i>albimanus</i>          | NEG |
| 298 | HND-2019-COM-024-0298 | El Paraíso        | Moroceli            | Barrio El Jicaró, Aldea Guadalajara | Resting collection | Culicidae | <i>Anopheles</i> | <i>Nyssorhyncus</i> | <i>albimanus</i>          | NEG |
| 299 | HND-2019-COM-024-0299 | El Paraíso        | Moroceli            | Barrio El Jicaró, Aldea Guadalajara | Resting collection | Culicidae | <i>Anopheles</i> | <i>Nyssorhyncus</i> | <i>albimanus</i>          | NEG |
| 300 | HND-2019-COM-024-0300 | El Paraíso        | Moroceli            | Barrio El Jicaró, Aldea Guadalajara | Resting collection | Culicidae | <i>Anopheles</i> | <i>Nyssorhyncus</i> | <i>albimanus</i>          | NEG |
| 301 | HND-2019-COM-024-0301 | El Paraíso        | Moroceli            | Barrio El Jicaró, Aldea Guadalajara | Resting collection | Culicidae | <i>Anopheles</i> | <i>Nyssorhyncus</i> | <i>albimanus</i>          | NEG |
| 302 | HND-2019-COM-024-0302 | El Paraíso        | Moroceli            | Barrio El Jicaró, Aldea Guadalajara | Resting collection | Culicidae | <i>Anopheles</i> | <i>Nyssorhyncus</i> | <i>albimanus</i>          | NEG |
| 319 | HND-2020-COM-024-0319 | Comayagua         | Comayagua           |                                     | BG Sentinel        | Culicidae | <i>Anopheles</i> | <i>Nyssorhyncus</i> | <i>albimanus</i>          | NEG |
| 320 | HND-2020-COM-024-0320 | Comayagua         | Comayagua           |                                     | BG Sentinel        | Culicidae | <i>Anopheles</i> | <i>Nyssorhyncus</i> | <i>albimanus</i>          | NEG |
| 321 | HND-2020-COM-024-0321 | Comayagua         | Comayagua           |                                     | CDC Light Trap     | Culicidae | <i>Anopheles</i> | <i>Anopheles</i>    | <i>pseudopunctipennis</i> | NEG |
| 322 | HND-2021-COM-024-0322 | Cortés            | Santa Cruz de Yojoa | San Antonio de Yure                 | CDC Light Trap     | Culicidae | <i>Anopheles</i> | <i>Nyssorhyncus</i> | <i>albimanus</i>          | NEG |
| 323 | HND-2021-COM-024-0323 | Comayagua         | San Jose de C.      | Barrio Montefresco                  | CDC Light Trap     | Culicidae | <i>Anopheles</i> | <i>Nyssorhyncus</i> | <i>argyritarsis</i>       | NEG |
| 324 | HND-2021-COM-024-0324 | Comayagua         | San Jose de C.      | Barrio Montefresco                  | CDC Light Trap     | Culicidae | <i>Anopheles</i> | <i>Nyssorhyncus</i> | <i>argyritarsis</i>       | NEG |
| 325 | HND-2021-COM-024-0325 | Comayagua         | San Jose de C.      | Barrio Montefresco                  | CDC Light Trap     | Culicidae | <i>Anopheles</i> | <i>Nyssorhyncus</i> | <i>argyritarsis</i>       | NEG |
| 326 | HND-2021-COM-024-0326 | Comayagua         | San Jose de C.      | Barrio Montefresco                  | CDC Light Trap     | Culicidae | <i>Anopheles</i> | <i>Nyssorhyncus</i> | <i>argyritarsis</i>       | NEG |
| 327 | HND-2021-COM-024-0327 | Comayagua         | San Jose de C.      | Barrio Montefresco                  | CDC Light Trap     | Culicidae | <i>Anopheles</i> | <i>Nyssorhyncus</i> | <i>argyritarsis</i>       | NEG |

|     |                       |           |                |                    |                |           |                  |                     |                     |     |
|-----|-----------------------|-----------|----------------|--------------------|----------------|-----------|------------------|---------------------|---------------------|-----|
| 328 | HND-2021-COM-024-0328 | Comayagua | San Jose de C. | Barrio Montefresco | CDC Light Trap | Culicidae | <i>Anopheles</i> | <i>Nyssorhyncus</i> | <i>argyritarsis</i> | NEG |
| 329 | HND-2021-COM-024-0329 | Comayagua | San Jose de C. | Barrio Montefresco | CDC Light Trap | Culicidae | <i>Anopheles</i> | <i>Nyssorhyncus</i> | <i>argyritarsis</i> | NEG |
| 330 | HND-2021-COM-024-0330 | Cortés    | Pimienta       | Colonia Barahona   | CDC Light Trap | Culicidae | <i>Anopheles</i> | <i>Nyssorhyncus</i> | <i>albimanus</i>    | NEG |
| 331 | HND-2021-COM-024-0331 | Cortés    | Pimienta       | Colonia Barahona   | CDC Light Trap | Culicidae | <i>Anopheles</i> | <i>Nyssorhyncus</i> | <i>albimanus</i>    | NEG |
